# Supplementary material for: Implications of high-dose vitamin D3 with and without vitamin C on bone mineralization and blood biochemical factors in broiler breeder hens and their offspring
Source: PeerJ. 2025 Apr 4;13:e18983. doi: 10.7717/peerj.18983 (PMC11974546; doi:10.7717/peerj.18983)
Supplement: Supplemental Information 2 [file peerj-13-18983-s002.xlsx]

## Sheet: production performance
VitD	factor2	TRT	SN1	SN2	SN3	SN4	SN5	SN6	SN7	SN8	SN9	SN10	SN11	SN12	SNT	SP	USN1	USN2	USN3	USN4	USN5	USN6	USN7	USN8	USN9	USN10	USN11	USN12	USNT	USP	EN1	EN2	EN3	EN4	EN5	EN6	EN7	EN8	EN9	EN10	EN11	EN12	ENT	ENPH	PP1	PP2	PP3	PP4	PP5
3500	0	N0	49	51	50	53	47	48	50	43	45	45	45	45	4071	99.5355	0	1	3	2	2	1	2	2	2	1	2	1	19	0.464548	49	52	53	55	49	49	52	45	47	46	47	46	4090	409	70	74.2857	75.7143	78.5714	70
3500	0	N0	54	52	51	50	49	47	43	43	43	40	40	42	4054	99.4359	1	0	2	2	2	1	2	3	3	3	2	2	23	0.56414	55	52	53	52	51	48	45	46	46	43	42	44	4077	407.7	78.5714	74.2857	75.7143	74.2857	72.8571
3500	0	N0	49	53	47	44	47	47	46	43	43	45	46	44	4054	99.5091	0	2	2	2	1	2	2	2	1	2	1	3	20	0.490918	49	55	49	46	48	49	48	45	44	47	47	47	4074	407.4	70	78.5714	70	65.7143	68.5714
3500	0	N0	49	51	50	53	47	48	50	43	45	45	45	45	4071	99.5355	0	1	3	2	2	1	2	2	2	1	2	1	19	0.464548	49	52	53	55	49	49	52	45	47	46	47	46	4090	409	70	74.2857	75.7143	78.5714	70
3500	0	N0	49	53	47	44	47	47	46	43	43	45	46	44	4054	99.5091	0	2	2	2	1	2	2	2	1	2	1	3	20	0.490918	49	55	49	46	48	49	48	45	44	47	47	47	4074	407.4	70	78.5714	70	65.7143	68.5714
3500	0	N0	35	50	57	52	54	47	44	42	42	45	42	42	4052	99.5822	3	2	0	1	1	2	2	2	1	1	1	1	17	0.417793	38	52	57	53	55	49	46	44	43	46	43	43	4069	406.9	54.2857	74.2857	81.4286	75.7143	78.5714
5500	0	H0	51	48	48	52	47	47	46	49	46	50	46	48	6078	99.7866	0	2	1	1	1	2	2	1	1	1	1	0	13	0.21343	51	50	49	53	48	49	48	50	47	51	47	48	6091	609.1	72.8571	71.4286	70	75.7143	68.5714
5500	0	H0	51	48	50	50	48	50	46	47	48	49	50	47	584	97.4958	0	0	2	2	2	2	0	1	2	2	0	2	15	2.50417	51	48	52	52	50	52	46	48	50	51	50	49	599	59.9	72.8571	68.5714	74.2857	74.2857	71.4286
5500	0	H0	49	41	48	50	49	53	46	50	51	49	45	52	583	97.1667	1	2	2	3	2	1	1	3	0	1	0	1	17	2.83333	50	43	50	53	51	54	47	53	51	50	45	53	600	60	71.4286	61.4286	71.4286	75.7143	72.8571
5500	0	H0	51	48	50	50	48	50	46	47	48	49	50	47	584	97.4958	0	0	2	2	2	2	0	1	2	2	0	2	15	2.50417	51	48	52	52	50	52	46	48	50	51	50	49	599	59.9	72.8571	68.5714	74.2857	74.2857	71.4286
5500	0	H0	49	41	48	50	49	53	46	50	51	49	45	52	583	97.1667	1	2	2	3	2	1	1	3	0	1	0	1	17	2.83333	50	43	50	53	51	54	47	53	51	50	45	53	600	60	71.4286	61.4286	71.4286	75.7143	72.8571
5500	0	H0	44	58	56	54	51	52	51	50	47	48	49	49	609	97.91	0	1	1	1	0	1	0	2	3	1	1	2	13	2.09003	44	59	57	55	51	53	51	52	50	49	50	51	622	62.2	62.8571	84.2857	81.4286	78.5714	72.8571
3500	vitC	NC	54	51	52	49	52	53	53	49	50	48	47	51	609	97.5962	0	0	1	2	1	1	1	2	2	2	1	2	15	2.40385	54	51	53	51	53	54	54	51	52	50	48	53	624	62.4	77.1429	72.8571	75.7143	72.8571	75.7143
3500	vitC	NC	51	49	51	51	52	49	53	48	48	47	48	48	595	98.1848	0	0	2	1	1	1	2	1	1	1	1	0	11	1.81518	51	49	53	52	53	50	55	49	49	48	49	48	606	60.6	72.8571	70	75.7143	74.2857	75.7143
3500	vitC	NC	49	51	52	53	47	49	53	48	47	45	50	49	593	97.6936	0	0	4	1	2	0	0	2	1	2	0	2	14	2.30643	49	51	56	54	49	49	53	50	48	47	50	51	607	60.7	70	72.8571	80	77.1429	70
3500	vitC	NC	54	51	52	49	52	53	53	49	50	48	47	51	609	97.5962	0	0	1	2	1	1	1	2	2	2	1	2	15	2.40385	54	51	53	51	53	54	54	51	52	50	48	53	624	62.4	77.1429	72.8571	75.7143	72.8571	75.7143
3500	vitC	NC	49	51	52	53	47	49	53	48	47	45	50	49	593	97.6936	0	0	4	1	2	0	0	2	1	2	0	2	14	2.30643	49	51	56	54	49	49	53	50	48	47	50	51	607	60.7	70	72.8571	80	77.1429	70
3500	vitC	NC	49	46	48	50	52	51	47	44	47	43	48	46	571	97.1088	0	2	3	2	0	2	2	1	1	2	0	2	17	2.89116	49	48	51	52	52	53	49	45	48	45	48	48	588	58.8	70	68.5714	72.8571	74.2857	74.2857
5500	vitC	HC	49	52	53	51	51	54	48	49	51	50	47	51	606	97.1154	1	2	0	2	2	2	1	1	3	2	0	2	18	2.88462	50	54	53	53	53	56	49	50	54	52	47	53	624	62.4	71.4286	77.1429	75.7143	75.7143	75.7143
5500	vitC	HC	51	49	48	46	51	49	48	46	44	44	41	48	565	97.9203	0	1	1	2	1	2	1	0	2	0	1	1	12	2.07972	51	50	49	48	52	51	49	46	46	44	42	49	577	57.7	72.8571	71.4286	70	68.5714	74.2857
5500	vitC	HC	56	51	56	50	50	51	48	46	50	48	47	47	600	98.3607	0	2	0	1	0	0	1	1	0	1	2	2	10	1.63934	56	53	56	51	50	51	49	47	50	49	49	49	610	61	80	75.7143	80	72.8571	71.4286
5500	vitC	HC	51	49	48	46	51	49	48	46	44	44	41	48	565	97.9203	0	1	1	2	1	2	1	0	2	0	1	1	12	2.07972	51	50	49	48	52	51	49	46	46	44	42	49	577	57.7	72.8571	71.4286	70	68.5714	74.2857
5500	vitC	HC	56	51	56	50	50	51	48	46	50	48	47	47	600	98.3607	0	2	0	1	0	0	1	1	0	1	2	2	10	1.63934	56	53	56	51	50	51	49	47	50	49	49	49	610	61	80	75.7143	80	72.8571	71.4286
5500	vitC	HC	44	53	59	52	50	50	51	47	46	51	45	46	594	97.6974	0	1	2	2	2	1	1	2	1	0	1	1	14	2.30263	44	54	61	54	52	51	52	49	47	51	46	47	608	60.8	62.8571	77.1429	87.1429	77.1429	74.2857
[truncated: 72 more columns]

## Sheet: Sheet1
VitD	factor2	TRT	PP1	PP2	PP3	PP4	PP5	PP6	PP7	PP8	PP9	PP10	PP11	PP12		wk1	wk2	wk3	wk4	wk5	wk6	wk7	wk8	wk9	wk10	wk11	wk12
N	0	N0	70	74.2857	75.7143	78.5714	70	70	74.2857	64.2857	67.1429	65.7143	67.1429	65.7143	3500D3×0C	68.8095	75.7143	74.7619	73.0952	71.4286	69.7619	69.2857	64.2857	64.5238	65.4762	65	65
N	0	N0	78.5714	74.2857	75.7143	74.2857	72.8571	68.5714	64.2857	65.7143	65.7143	61.4286	60	62.8571	5500D3× 0C	70.7143	69.2857	73.8095	75.7143	71.6667	74.7619	67.8571	72.381	71.1905	71.9048	68.3333	72.1429
N	0	N0	70	78.5714	70	65.7143	68.5714	70	68.5714	64.2857	62.8571	67.1429	67.1429	67.1429	3500 D3×150 C	72.8571	71.6667	76.6667	74.7619	73.5714	73.5714	75.7143	70.4762	70.7143	68.3333	69.7619	72.381
N	0	N0	70	74.2857	75.7143	78.5714	70	70	74.2857	64.2857	67.1429	65.7143	67.1429	65.7143	5500D3×150C	73.3333	74.7619	77.1429	72.619	73.5714	74.0476	70.7143	67.8571	69.7619	68.8095	65.4762	70.4762
N	0	N0	70	78.5714	70	65.7143	68.5714	70	68.5714	64.2857	62.8571	67.1429	67.1429	67.1429
N	0	N0	54.2857	74.2857	81.4286	75.7143	78.5714	70	65.7143	62.8571	61.4286	65.7143	61.4286	61.4286		wk1	wk2	wk3	wk4	wk5	wk6	wk7	wk8	wk9	wk10	wk11	wk12
H	0	H0	72.8571	71.4286	70	75.7143	68.5714	70	68.5714	71.4286	67.1429	72.8571	67.1429	68.5714	0vit C	69.7619	72.5	74.2857	74.4048	71.5476	72.2619	68.5714	68.3333	67.8571	68.6905	66.6667	68.5714
H	0	H0	72.8571	68.5714	74.2857	74.2857	71.4286	74.2857	65.7143	68.5714	71.4286	72.8571	71.4286	70	150vit C	73.0952	73.2143	76.9048	73.6905	73.5714	73.8095	73.2143	69.1667	70.2381	68.5714	67.619	71.4286
H	0	H0	71.4286	61.4286	71.4286	75.7143	72.8571	77.1429	67.1429	75.7143	72.8571	71.4286	64.2857	75.7143		wk1	wk2	wk3	wk4	wk5	wk6	wk7	wk8	wk9	wk10	wk11	wk12
H	0	H0	72.8571	68.5714	74.2857	74.2857	71.4286	74.2857	65.7143	68.5714	71.4286	72.8571	71.4286	70	3500 vitD	70.8333	73.6905	75.7143	73.9286	72.5	71.6667	72.5	67.381	67.619	66.9048	67.381	68.6905
H	0	H0	71.4286	61.4286	71.4286	75.7143	72.8571	77.1429	67.1429	75.7143	72.8571	71.4286	64.2857	75.7143	5000 vitD	72.0238	72.0238	75.4762	74.1667	72.619	74.4048	69.2857	70.119	70.4762	70.3571	66.9048	71.3095
H	0	H0	62.8571	84.2857	81.4286	78.5714	72.8571	75.7143	72.8571	74.2857	71.4286	70	71.4286	72.8571
N	vitC	NC	77.1429	72.8571	75.7143	72.8571	75.7143	77.1429	77.1429	72.8571	74.2857	71.4286	68.5714	75.7143
N	vitC	NC	72.8571	70	75.7143	74.2857	75.7143	71.4286	78.5714	70	70	68.5714	70	68.5714
N	vitC	NC	70	72.8571	80	77.1429	70	70	75.7143	71.4286	68.5714	67.1429	71.4286	72.8571
N	vitC	NC	77.1429	72.8571	75.7143	72.8571	75.7143	77.1429	77.1429	72.8571	74.2857	71.4286	68.5714	75.7143
N	vitC	NC	70	72.8571	80	77.1429	70	70	75.7143	71.4286	68.5714	67.1429	71.4286	72.8571
N	vitC	NC	70	68.5714	72.8571	74.2857	74.2857	75.7143	70	64.2857	68.5714	64.2857	68.5714	68.5714
H	vitC	HC	71.4286	77.1429	75.7143	75.7143	75.7143	80	70	71.4286	77.1429	74.2857	67.1429	75.7143
H	vitC	HC	72.8571	71.4286	70	68.5714	74.2857	72.8571	70	65.7143	65.7143	62.8571	60	70
H	vitC	HC	80	75.7143	80	72.8571	71.4286	72.8571	70	67.1429	71.4286	70	70	70
H	vitC	HC	72.8571	71.4286	70	68.5714	74.2857	72.8571	70	65.7143	65.7143	62.8571	60	70
H	vitC	HC	80	75.7143	80	72.8571	71.4286	72.8571	70	67.1429	71.4286	70	70	70
H	vitC	HC	62.8571	77.1429	87.1429	77.1429	74.2857	72.8571	74.2857	70	67.1429	72.8571	65.7143	67.1429

## Sheet: Egg quality
VitD	factor2	TRT	ew1	ew2	el1	el2	ed2	ed3	ah1	ah2	yh1	yh2	yd1	yd2	yc1	yc2	YCT	aw1	aw2	yw1	yw2	SW1	SW2	SWT	AP1	AP2	APT	YP1	YP2	YPT	SP1	SP2	SPT	YI1	YI2	YIT	EI1	EI2	EIT	HU1	HU2	HUT	ST1	ST2	STT	SA1	SA2	SAT	SG
3500	0	N0	67.6	66.73	5.86	5.9	4.36	4.3	8.25	7.39	20.22	20.55	4.23	4.2	8	7	7.5	40.23	38.69	21.66	21.82	5.71	6.22	5.965	59.5118	57.9799	58.7459	32.0414	32.6989	32.3702	8.44675	9.32114	8.88395	20.9199	20.438	20.6789	74.4027	72.8814	73.642	88.8618	83.9883	86.4251	0.4	0.37	0.385	92.4	91.09	91.745	1.078
3500	0	N0	70.12	67.98	5.8	5.85	4.4	4.3	7.08	6.57	19.52	18.99	4.3	4.4	8	8	8	41.02	38.15	23.7	24.08	5.4	5.75	5.575	58.4997	56.1194	57.3096	33.7992	35.4222	34.6107	7.70108	8.45837	8.07973	22.0287	23.1701	22.5994	75.8621	73.5043	74.6832	81.0072	78.1111	79.5591	0.43	0.37	0.4	92.4	91.33	91.865	1.077
3500	0	N0	72.24	66.2	5.83	5.6	4.43	4.4	8.38	7.27	18.75	19.44	4.5	4.2	7	8	7.5	44.83	39.28	22.36	21.75	5.05	5.17	5.11	62.057	59.3353	60.6962	30.9524	32.855	31.9037	6.99059	7.80967	7.40013	24	21.6049	22.8025	75.9863	78.5714	77.2789	88.4616	83.3794	85.9205	0.36	0.35	0.355	91	90.21	90.605	1.072
3500	0	N0	68.63	67.3	5.7	5.5	4.36	4.4	9.25	7.52	19.26	19.54	4.46	4.3	8	7	7.5	41.37	39.39	21.86	23.14	5.4	4.77	5.085	60.2798	58.529	59.4044	31.852	34.3834	33.1177	7.86828	7.08767	7.47797	23.1568	22.0061	22.5815	76.4912	80	78.2456	93.9143	84.6405	89.2774	0.4	0.37	0.385	92	91	91.5	1.074
3500	0	N0	70.12	67.98	5.8	5.85	4.4	4.3	7.08	6.57	19.52	18.99	4.3	4.4	8	8	8	41.12	38.15	23.7	24.08	5.3	5.75	5.525	58.6423	56.1194	57.3809	33.7992	35.4222	34.6107	7.55847	8.45837	8.00842	22.0287	23.1701	22.5994	75.8621	73.5043	74.6832	81.0072	78.1111	79.5591	0.43	0.37	0.4	90.4	90.23	90.315	1.077
3500	0	N0	72.24	66.2	5.83	5.6	4.43	4.4	8.38	7.27	18.75	19.44	4.5	4.2	7	8	7.5	43.93	39.28	22.36	21.75	5.95	5.17	5.56	60.8112	59.3353	60.0733	30.9524	32.855	31.9037	8.23643	7.80967	8.02305	24	21.6049	22.8025	75.9863	78.5714	77.2789	88.4616	83.3794	85.9205	0.36	0.35	0.355	90	90.41	90.205	1.062
5500	0	H0	67.78	70.27	5.76	5.8	4.33	4.4	9.9	8.62	19.54	20.25	4.4	4.3	8	8	8	40.59	41.21	21.55	22.56	5.64	6.5	6.07	59.8849	58.6452	59.2651	31.794	32.1047	31.9494	8.32104	9.25004	8.78554	22.5179	21.2346	21.8762	75.1736	75.8621	75.5178	97.2196	90.2608	93.7402	0.4	0.45	0.425	91.2	90.81	91.005	1.079
5500	0	H0	67.63	68.47	5.7	5.5	4.33	4.4	7.44	6.72	18.77	19.75	4.16	4.4	8	8	8	40.12	40.5	21.3	22.65	6.21	5.32	5.765	59.3228	59.15	59.2364	31.4949	33.0802	32.2875	9.18232	7.76983	8.47607	22.163	22.2785	22.2208	75.9649	80	77.9825	84.0513	79.0248	81.538	0.43	0.4	0.415	92.4	91.74	92.07	1.077
5500	0	H0	65.34	71.71	5.73	6	4.46	4.3	7.74	7.49	18.53	20.02	4.3	4.5	7	7	7	38.36	40.93	21.04	24.55	5.94	6.23	6.085	58.7083	57.0771	57.8927	32.2008	34.2351	33.218	9.09091	8.68777	8.88934	23.2056	22.4775	22.8416	77.836	71.6667	74.7513	86.5036	83.2468	84.8752	0.45	0.45	0.45	92	91.5	91.75	1.08
5500	0	H0	67.78	70.27	5.76	5.8	4.33	4.4	9.9	8.62	19.54	20.25	4.4	4.3	8	8	8	40.59	41.21	21.55	22.56	5.64	6.5	6.07	59.8849	58.6452	59.2651	31.794	32.1047	31.9494	8.32104	9.25004	8.78554	22.5179	21.2346	21.8762	75.1736	75.8621	75.5178	97.2196	90.2608	93.7402	0.4	0.45	0.425	91.2	90.81	91.005	1.079
5500	0	H0	67.63	68.47	5.7	5.5	4.33	4.4	7.44	6.72	18.77	19.75	4.16	4.4	8	8	8	40.12	40.5	21.3	22.65	6.21	5.32	5.765	59.3228	59.15	59.2364	31.4949	33.0802	32.2875	9.18232	7.76983	8.47607	22.163	22.2785	22.2208	75.9649	80	77.9825	84.0513	79.0248	81.538	0.43	0.4	0.415	92.4	91.74	92.07	1.077
5500	0	H0	67.53	68.28	5.76	5.85	4.33	4.4	6.94	7.09	19.4	19.04	4.43	4.4	8	8	8	39.57	39.73	22.26	22.96	5.7	5.59	5.645	58.5962	58.1869	58.3915	32.9631	33.6262	33.2947	8.44069	8.18688	8.31379	22.8351	23.1092	22.9721	75.1736	75.2137	75.1936	80.8272	81.6097	81.2184	0.43	0.42	0.425	91	91	91	1.08
3500	vitC	NC	68.36	68.92	5.73	5.8	4.4	4.4	9.55	6.72	19.55	20.68	4.26	4.3	9	8	8.5	42.34	39.92	20.26	23.37	5.76	5.63	5.695	61.9368	57.9222	59.9295	29.6372	33.9089	31.773	8.42598	8.16889	8.29744	21.7903	20.793	21.2917	76.7888	75.8621	76.3254	95.445	78.8859	87.1655	0.43	0.42	0.425	92.6	91.3	91.95	1.076
3500	vitC	NC	70.8	67.23	5.96	5.6	4.33	4.3	7.29	7.2	18.48	19.11	4.26	4.3	9	8	8.5	41.98	38.59	22.78	22.96	6.04	5.68	5.86	59.2938	57.4	58.3469	32.1751	34.1514	33.1633	8.53107	8.44861	8.48984	23.0519	22.5013	22.7766	72.651	76.7857	74.7184	82.2057	82.6347	82.4202	0.49	0.42	0.455	92.2	92.5	92.35	1.077
3500	vitC	NC	66.58	69.49	5.66	5.75	4.36	4.4	7.38	6.84	18.63	19.37	4.36	5	8	7	7.5	39.68	40.46	21.28	23.03	5.62	6	5.81	59.5975	58.2242	58.9108	31.9616	33.1415	32.5515	8.44097	8.63434	8.53765	23.4031	25.8131	24.6081	77.0318	76.5217	76.7768	83.9676	79.5527	81.7601	0.41	0.42	0.415	92	92.9	92.45	1.076
3500	vitC	NC	69.84	69.63	5.96	6	4.26	4.3	7.5	6.22	19.38	19.2	4.4	4.7	8	8	8	41.26	38.93	22.76	24.55	5.82	6.15	5.985	59.0779	55.9098	57.4939	32.5888	35.2578	33.9233	8.33333	8.8324	8.58287	22.7038	24.4792	23.5915	71.4765	71.6667	71.5716	83.8202	74.9647	79.3925	0.41	0.47	0.44	93	91	92	1.073
3500	vitC	NC	66.58	69.49	5.66	5.75	4.36	4.4	7.38	6.84	18.63	19.37	4.36	5	8	7	7.5	39.68	40.46	21.28	23.03	5.62	6	5.81	59.5975	58.2242	58.9108	31.9616	33.1415	32.5515	8.44097	8.63434	8.53765	23.4031	25.8131	24.6081	77.0318	76.5217	76.7768	83.9676	79.5527	81.7601	0.41	0.42	0.415	92	92.9	92.45	1.075
3500	vitC	NC	69.84	69.63	5.96	6	4.26	4.3	7.5	6.22	19.38	19.2	4.4	4.7	8	8	8	41.26	38.93	22.76	24.55	5.82	6.15	5.985	59.0779	55.9098	57.4939	32.5888	35.2578	33.9233	8.33333	8.8324	8.58287	22.7038	24.4792	23.5915	71.4765	71.6667	71.5716	83.8202	74.9647	79.3925	0.41	0.47	0.44	93	91.5	92.25	1.073
5500	vitC	HC	72.55	66.84	5.8	5.6	4.33	4.3	8.16	8.37	18.72	20.39	4.26	4.4	8	8	8	45.12	38.34	21.77	22.47	5.66	6.03	5.845	62.1916	57.3609	59.7762	30.0069	33.6176	31.8122	7.80152	9.02154	8.41153	22.7564	21.5792	22.1678	74.6552	76.7857	75.7204	87.1205	89.7162	88.4183	0.43	0.45	0.44	91.4	91.86	91.63	1.076
5500	vitC	HC	67.93	70.28	5.96	5.75	4.4	4.45	7.43	7.44	19.89	19.12	4.46	4.5	9	8	8.5	38.7	41.55	22.97	22.69	6.26	6.04	6.15	56.9704	59.1207	58.0455	33.8142	32.2851	33.0497	9.21537	8.59419	8.90478	22.4233	23.5356	22.9794	73.8255	77.3913	75.6084	83.9052	83.3192	83.6122	0.43	0.45	0.44	92.8	92.38	92.59	1.077
5500	vitC	HC	67.93	68.29	5.73	5.85	4.33	4.3	6.65	7.77	19.69	20.44	4.53	4.35	8	8	8	39.28	40.13	22.63	21.85	6.02	6.31	6.165	57.8242	58.7641	58.2942	33.3137	31.9959	32.6548	8.86206	9.24001	9.05103	23.0066	21.2818	22.1442	75.5672	73.5043	74.5357	78.6981	85.8981	82.2981	0.46	0.47	0.465	92	93.3	92.65	1.075
5500	vitC	HC	67.93	70.28	5.96	5.75	4.4	4.45	7.43	7.44	19.89	19.12	4.46	4.5	9	8	8.5	38.7	41.55	22.97	22.69	6.26	6.04	6.15	56.9704	59.1207	58.0455	33.8142	32.2851	33.0497	9.21537	8.59419	8.90478	22.4233	23.5356	22.9794	73.8255	77.3913	75.6084	83.9052	83.3192	83.6122	0.43	0.45	0.44	92.8	92.38	92.59	1.077
5500	vitC	HC	67.93	68.29	5.73	5.85	4.33	4.3	6.65	7.77	19.69	20.44	4.53	4.35	8	8	8	39.28	40.13	22.63	21.85	6.02	6.31	6.165	57.8242	58.7641	58.2942	33.3137	31.9959	32.6548	8.86206	9.24001	9.05103	23.0066	21.2818	22.1442	75.5672	73.5043	74.5357	78.6981	85.8981	82.2981	0.46	0.47	0.465	92	92.3	92.15	1.075
5500	vitC	HC	63.93	69.06	5.56	5.8	4.26	4.35	8.46	7.72	19.29	19.32	4.46	4.55	9	8	8.5	37.63	40.6	20.36	22.33	5.94	6.13	6.035	58.8613	58.7895	58.8254	31.8473	32.3342	32.0908	9.29141	8.87634	9.08388	23.1208	23.5507	23.3358	76.6187	75	75.8094	90.9182	85.3921	88.1551	0.41	0.5	0.455	91	93	92	1.072
[truncated: 2 more columns]

## Sheet: mineralization
VitD	factor2	TRT	HBASH	HBDM	HBca	HBP	shellCa	shellP	CDM	CASH	Cca	CP
3500	0	N0	53.2	74.1	385	176	360	1.1	26.57	6.8495	13.7	10.3
3500	0	N0	54.36	69.34	380	176	341	1.1	28.4	7.1925	17.1	10.95
3500	0	N0	53.2	78.57	368	161	360.25	1.7	26.9	6.764	15	10.95
3500	0	N0	53.2	73.8	362	171	354.3	1.6	26.57	8.274	15	11.5
3500	0	N0	54.4	72.9	360	179	350	1.6	28.4	6.65	14.7	10.9
3500	0	N0	54.1	75	386	160	360	1.1	26.9	7.35	13	11.3
5500	0	H0	56.36	78.68	378	175	351.775	2.2	28.4	6.65	15	12.38
5500	0	H0	55.32	76.5	372	174	360.125	2.6	29.22	8.4	14.5	10.3
5500	0	H0	54.31	75.6	380	160	360	2.4	27.11	8.1795	16	11.45
5500	0	H0	55.11	72.88	388	161	351	2.2	28.4	8.925	17	11.32
5500	0	H0	54.34	75	390	169	360	1.6	29.22	6.65	14	10.8
5500	0	H0	55.6	73.9	365	174	364	2.2	27.11	7.35	17	11.22
3500	vitC	NC	54.38	74	372	179	364	2.8	29.71	7.6	16.4	11.8
3500	vitC	NC	55.21	73.01	388	171	364	2.9	30.45	8.925	16	14.57
3500	vitC	NC	54.89	75.64	377	176	372.625	2.4	30.8	7.125	16	10.1
3500	vitC	NC	55.32	76	386	171	360	2.7	29.71	7.35	16	12.1
3500	vitC	NC	53.11	73	361	168	350	2.2	30.45	6.65	15	11.1
3500	vitC	NC	53.21	74.13	368	171	360	2.7	30.8	7.35	15	10.9
5500	vitC	HC	57.37	75.2	371	175	360	2.2	26.25	7.201	18	10.02
5500	vitC	HC	56.51	73.24	386	170	380	1.6	25.82	8.19	18.1	12.81
5500	vitC	HC	55.98	79.25	377	167	350	1.1	25.45	8.55	17	15.1
5500	vitC	HC	56.71	75.12	383	161	350	2.2	26.25	8.4	19	12.86
5500	vitC	HC	55.98	74.11	387	169	370	1.6	25.82	8.075	18	13.1
5500	vitC	HC	55.54	76.66	377	162	370	2.2	25.45	8.4	17	10.9

## Sheet: Hen blood paramters
VitD	factor2	TRT	Glu	CHO	TG	AST	ALT	ALP	Ca	Pho	TAC	UR	MDA	pro	est	25-OHD	125-OHD	pth	Calcitonin	NDt
3500	0	N0	240	326	346	101	6	920	8.1	2.3	0.57	2.17	2.8	1110.6	422.2	24.6	113.4	84.672	186.095	5.5
3500	0	N0	264	395	274	93	7	985	6.3	2	0.53	2.24	3.5	493.6	464.6	28.3	136.8	81.9776	173.607	5
3500	0	N0	240	180	332	127	6	830	6.5	2.8	0.51	1.85	3.9	863.8	221	21.6	126.6	87.0912	171.648	4.5
3500	0	N0	224	423	355	92	8	965	7.1	2.3	0.57	3.17	2.4	1234	404.2	25.6	137.4	89.28	189.847	6
3500	0	N0	284	283	262	94	5	945	6.3	2	0.53	1.24	3.3	246.8	376.6	32.3	133.2	75.8016	222.343	4
3500	0	N0	244	186	330	128	7	840	7.5	2.8	0.51	1.85	3.6	863.8	207	24.6	113.4	75.2032	235.015	6
5500	0	H0	184	183	313	120	5	1000	7.2	2.2	0.41	1.55	2	617	237	34.2	135	81.3312	207.187	6
5500	0	H0	228	224	349	143	10	510	10.7	2.6	0.6	1.84	4.5	1357.4	286.1	52.9	124.2	75.5712	217.797	8
5500	0	H0	220	171	247	86	8	800	8.4	2.5	0.69	2.08	1.9	1357.4	220	30.6	127.2	75.5712	209.484	6
5500	0	H0	192	212	320	120	7	960	9.3	2.2	0.41	0.55	1.5	863.8	257	31.2	136.2	82.4832	199.547	8
5500	0	H0	244	186	368	144	12	535	7.7	2.6	0.6	1.84	5	1480.8	302.1	55.9	136.8	53.6832	255.661	8
5500	0	H0	228	197	227	82	10	840	8.4	2.5	0.49	1.08	1.7	1308.04	226	39.6	133.2	70.5952	209.454	6
3500	vitC	NC	228	195	326	117	6	655	7.1	2.1	0.75	1.93	3.8	863.8	477.9	22.9	174.85	66.7008	241.315	5
3500	vitC	NC	228	189	351	105	9	710	8.1	2.1	0.74	3.06	2.2	851.46	931.1	33.9	147.55	66.2624	220.52	7
3500	vitC	NC	196	215	336	119	11	750	8.7	2.7	0.63	2.44	1.3	555.3	224	28.6	160.55	68.6592	227.308	6
3500	vitC	NC	240	189	323	113	8	670	7.6	2.5	0.85	0.93	4	1110.6	486.9	38.9	164.45	72.4608	237.485	7
3500	vitC	NC	232	198	358	96	7	660	8.3	1.9	0.74	4.06	2	567.64	936.1	24.9	150.15	78.5664	190.262	8
3500	vitC	NC	208	172	350	113	13	705	7.7	3.7	0.63	2.44	1.4	678.7	207	21.6	135.85	83.6352	200.793	7
5500	vitC	HC	200	177	337	97	7	640	8.5	2.3	0.67	2.84	1.8	1974.4	562	40.5	143.65	56.2176	314.772	5.5
5500	vitC	HC	312	147	394	112	11	595	10.8	2.4	0.54	2.11	3.9	493.6	409	44.7	153.4	72	178.611	8
5500	vitC	HC	220	192	335	131	8	690	10.1	1.7	0.54	1.64	3.9	1234	198	54.6	157.95	76.7232	219.491	9
5500	vitC	HC	220	174	332	96	8	630	9.5	2.3	0.67	2.84	1.8	1974.4	425	43.5	160.55	61.9776	308.652	7
5500	vitC	HC	328	159	392	114	20	570	9.8	2.4	0.54	2.11	3.4	617	395	38.7	169	63.936	279.504	8
5500	vitC	HC	200	204	325	130	10	680	9.1	2.7	0.54	0.64	3.9	1234	203	45.6	174.85	76.7232	214.3	8

## Sheet: chiken blood paramters
VitD	factor2	TRT	ALP	Ca	PHO	25-OHD	125-OHD	pth
3500	0	N0	2036	9.1	5.7	10.4	60	90.9
3500	0	N0	2179	8.8	6	11.5	69	83.2
3500	0	N0	2243	9.3	5.1	8.2	66	90.1
3500	0	N0	2436	8.5	5.7	10.4	69	96.9
3500	0	N0	2279	9.2	6	11.5	36	83.2
3500	0	N0	2343	9.6	5.1	8.2	67	72
5500	0	H0	1696	12.6	5.7	16.1	99	72.3
5500	0	H0	2051	11.1	5.7	12.5	81	37.4
5500	0	H0	2270	9.6	4.5	18.3	53	65
5500	0	H0	1796	11.6	5.7	16.1	97	62.3
5500	0	H0	1951	11.4	5.7	12.5	60	47.4
5500	0	H0	2170	10.5	4.5	19.5	60	98
3500	vitC	NC	2251	10.5	4.8	8.4	94	68.4
3500	vitC	NC	1867	9.5	6.9	12.3	100	50
3500	vitC	NC	2013	9.9	5.1	11.5	68	65
3500	vitC	NC	3251	10.5	4.8	8.4	65	58.4
3500	vitC	NC	2067	9.7	6.9	11.3	57	50
3500	vitC	NC	1513	9.9	5.1	10.5	78	33
5500	vitC	HC	1779	9.3	4.5	9.8	90	49.6
5500	vitC	HC	1763	11.4	4.5	16.9	70	46.2
5500	vitC	HC	2197	13.5	5.1	17.5	84	54.5
5500	vitC	HC	1879	12.3	4.5	16.8	100	68.9
5500	vitC	HC	1963	11.4	4.5	16.9	73	46.5
5500	vitC	HC	2197	12.7	5.1	11.7	64	50.3
